# Supplementary material for: The WAVE regulatory complex interacts with Boc and is required for Shh-mediated axon guidance
Source: PubMed Central journal article supplement — iScience. 2024 Nov 6;27(12):111333. doi: 10.1016/j.isci.2024.111333 (PMC11617374; doi:10.1016/j.isci.2024.111333), 2024-11-06
Supplement: mmc1.pdf [file mmc1.pdf]

**iScience, Volume 27**

**Supplemental information**

**The WAVE regulatory complex  
interacts with Boc and is required  
for Shh-mediated axon guidance**

**Nursen Balekoglu, Jean-Francois Michaud, Rachelle Sauvé, Kehinde S. Ayinde, Sichun Lin, Yijun Liu, Daniel A. Kramer, Kaiyue Zhang, Anika Steffen, Theresia Stradal, Stephane Angers, Baoyu Chen, Patricia T. Yam, and Frédéric Charron**

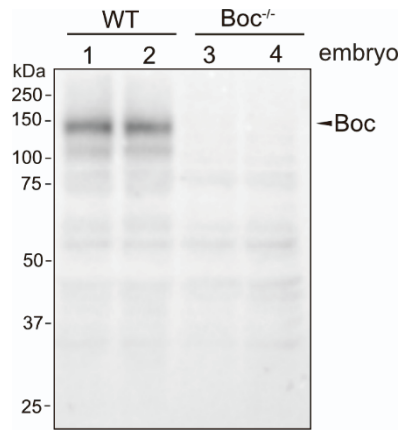

**Figure S1. Validation of the Boc antibody, related to Figure 2.** Western blot of lysates of brains from two wildtype (WT) and two *Boc*<sup>-/-</sup> E11.5 mouse embryos immunoblotted with an anti-Boc antibody. The Boc antibody specifically detects only Boc, as there are bands present only in the WT lysates and an absence of signal in the *Boc*<sup>-/-</sup> lysates.

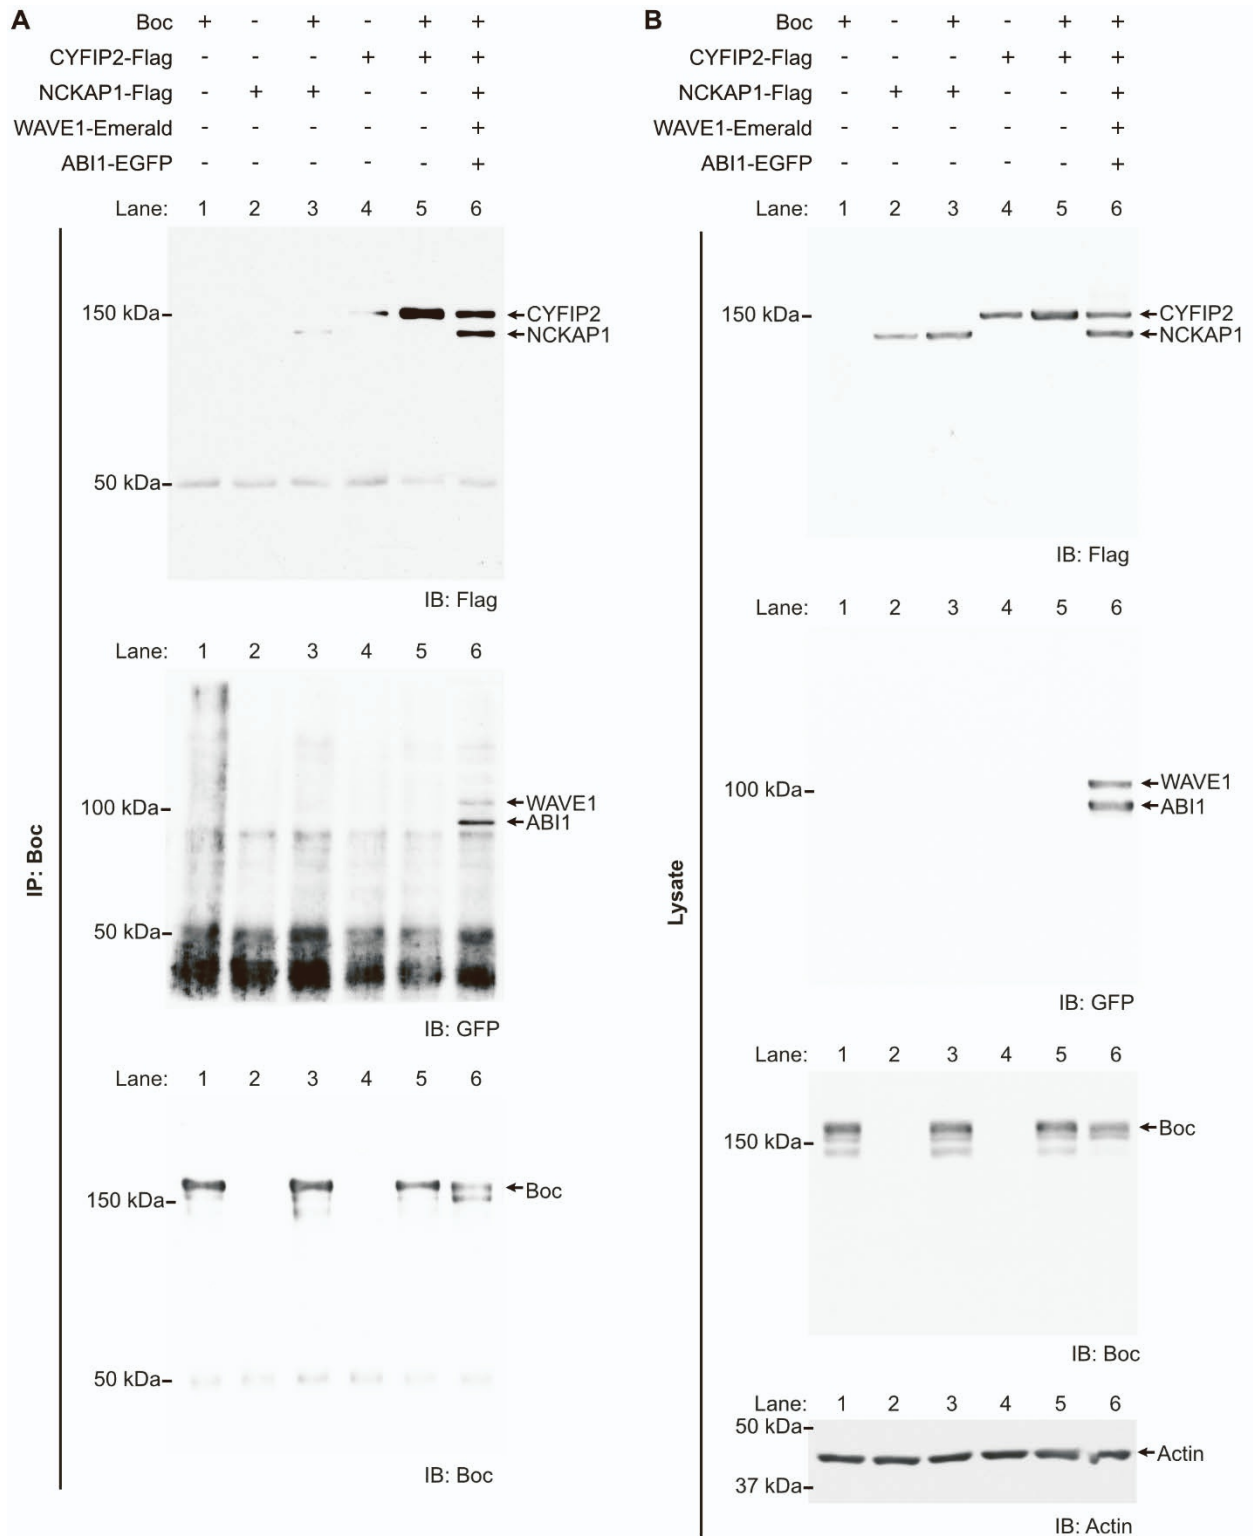

corresponding to the Western blots of the immunoprecipitated proteins in Figure 2A. **(B)** Entire uncropped gels corresponding to the Western blots of the lysate in Figure 2A.

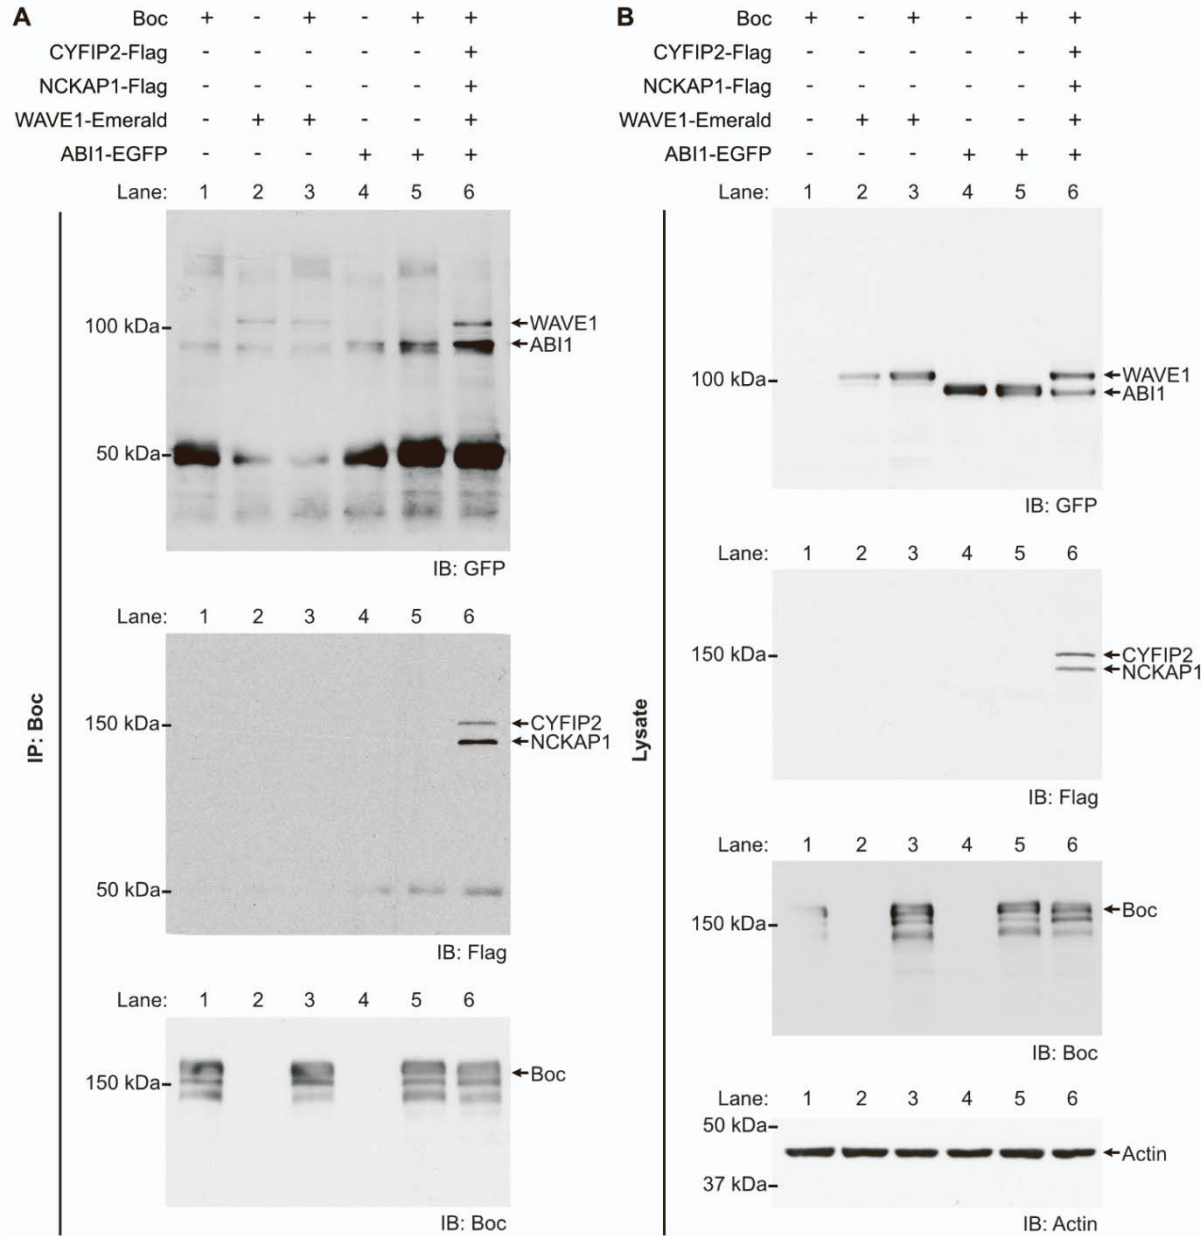

**Figure S3. Entire gels from Figure 2D, related to Figure 2.** Boc and tagged WRC constructs were expressed in HEK293T cells as indicated. The lysates were immunoprecipitated with an anti-Boc antibody and interacting proteins were analyzed through SDS-PAGE and Western blot. **(A)** Entire uncropped gels corresponding to the Western blots of the immunoprecipitated proteins in Figure 2D. **(B)** Entire uncropped gels corresponding to the Western blots of the lysate in Figure 2D.

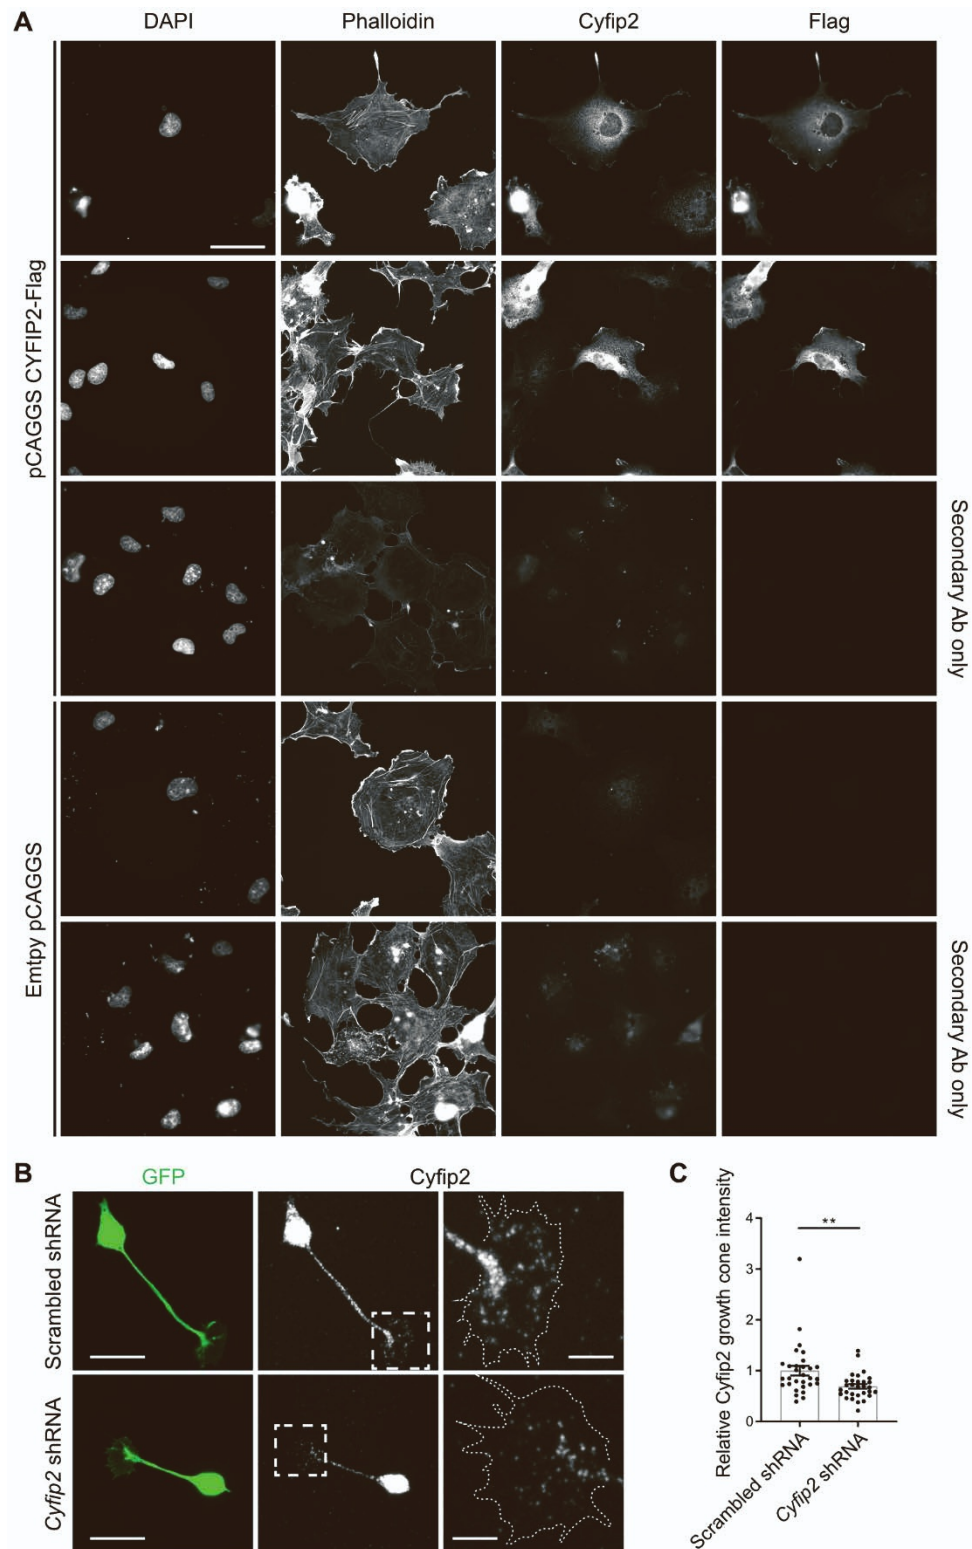

**Figure S4. Validation of the CYFIP2 antibody, related to Figures 4 and 5. (A)** COS7 cells were transfected to express CYFIP2-Flag or an empty vector control (empty pCAGGS). Cells were immunostained with anti-CYFIP2 and anti-Flag antibody. Nuclei were labeled with DAPI and F-actin was labelled with phalloidin. The CYFIP2 antibody detects overexpressed CYFIP2-Flag, giving a similar

immunostaining pattern to the Flag antibody. Conditions with the secondary antibody only serve as additional controls. Scale bar: 50  $\mu\text{m}$ . **(B, C)** Dissociated E13.5 rat commissural neurons were electroporated with shRNA against *Cytip2* or with scrambled shRNA as a control. **(B)** Successfully electroporated neurons express GFP. Immunostaining was performed with the CYFIP2 antibody. Scale bar: 20  $\mu\text{m}$  (left), 5  $\mu\text{m}$  (zoomed images, right). **(C)** Relative *Cytip2* fluorescence intensity ( $\pm\text{SEM}$ ) of commissural neuron growth cones. *Cytip2* immunostaining is significantly reduced in neurons knocked down for *Cytip2*. Unpaired t-test, n=30 neurons per condition. \*\* =  $p < 0.01$ .

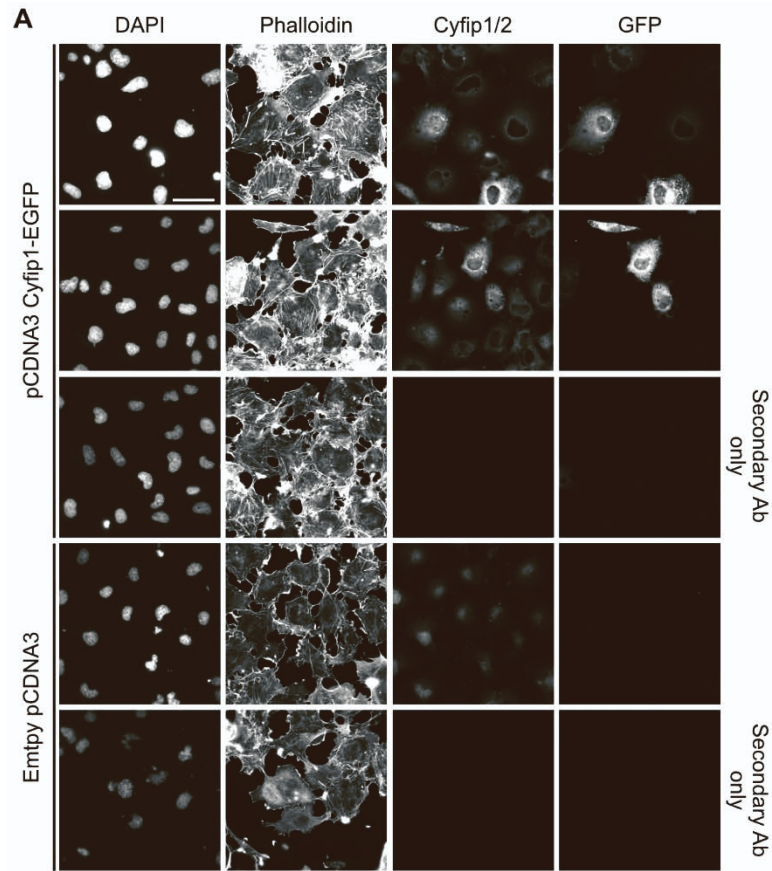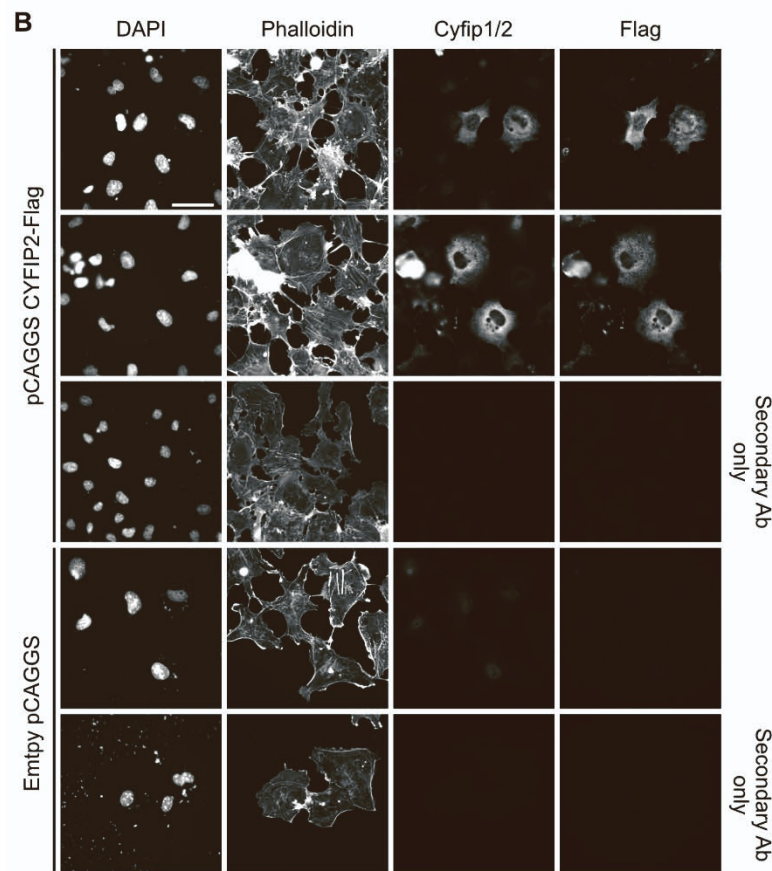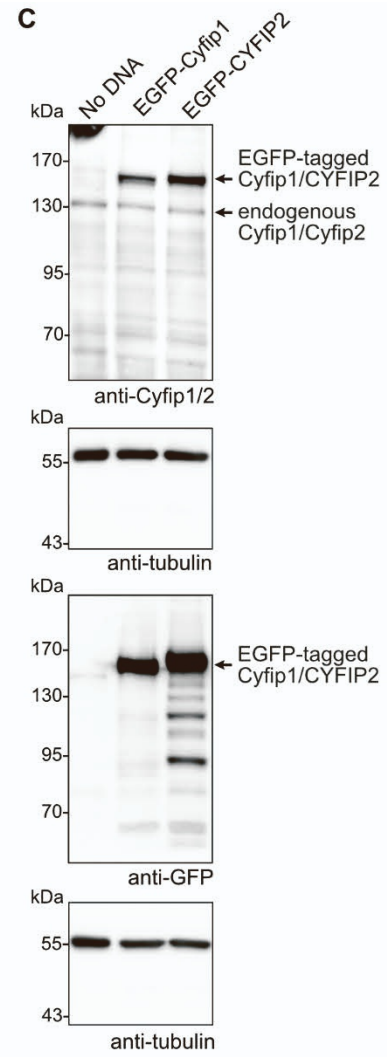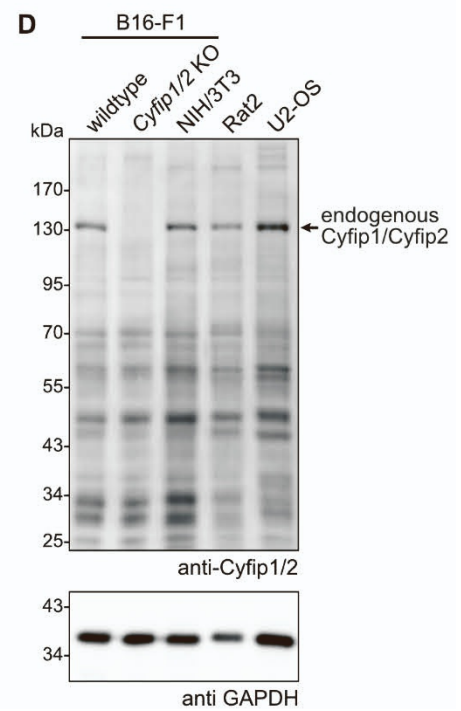



**Figure S5. The Cyfip1/2 antibody recognises both Cyfip1 and Cyfip2, related to Figures 4 and 5. (A)** COS7 cells were transfected to express Cyfip1-EGFP or an empty vector control (empty pCDNA3). Cells were immunostained with anti-Cyfip1/2 and anti-GFP antibody. Nuclei were labeled with DAPI and F-actin was labelled with phalloidin. The Cyfip1/2 antibody detects overexpressed Cyfip1-EGFP, which is labelled with the GFP antibody. The Cyfip1/2 antibody also detects endogenous Cyfip1/2. Conditions with the secondary antibody only serve as additional controls. Scale bar: 50  $\mu$ m. **(B)** COS7 cells were transfected to express CYFIP2-Flag or an empty vector control (empty pCAGGS). Cells were immunostained with anti-Cyfip1/2 and anti-Flag antibody. Nuclei were labeled with DAPI and F-actin was labelled with phalloidin. The Cyfip1/2 antibody detects overexpressed CYFIP2-Flag, which is labelled with the Flag antibody. The Cyfip1/2 antibody also detects endogenous Cyfip1/2. Conditions with the secondary antibody only serve as additional controls. Scale bar: 50  $\mu$ m. **(C)** Western blot of B16-F1 mouse melanoma cells expressing EGFP-Cyfip1 or EGFP-CYFIP2, immunoblotted with anti-Cyfip1/2 to detect endogenous and overexpressed Cyfip1/2, anti-GFP to detect overexpressed EGFP-Cyfip1 or EGFP-CYFIP2, and anti-tubulin as the loading control for each respective membrane. **(D)** Western blot of B16-F1 (mouse) wildtype and *Cyfip1/2* knockout (KO), NIH/3T3 (mouse), Rat2 (rat) and U2-OS (human) cell lines. The anti-Cyfip1/2 antibody recognises mouse, rat and human Cyfip1/2, with an absence of signal in the *Cyfip1/2* knockout. GAPDH was used as a loading control.

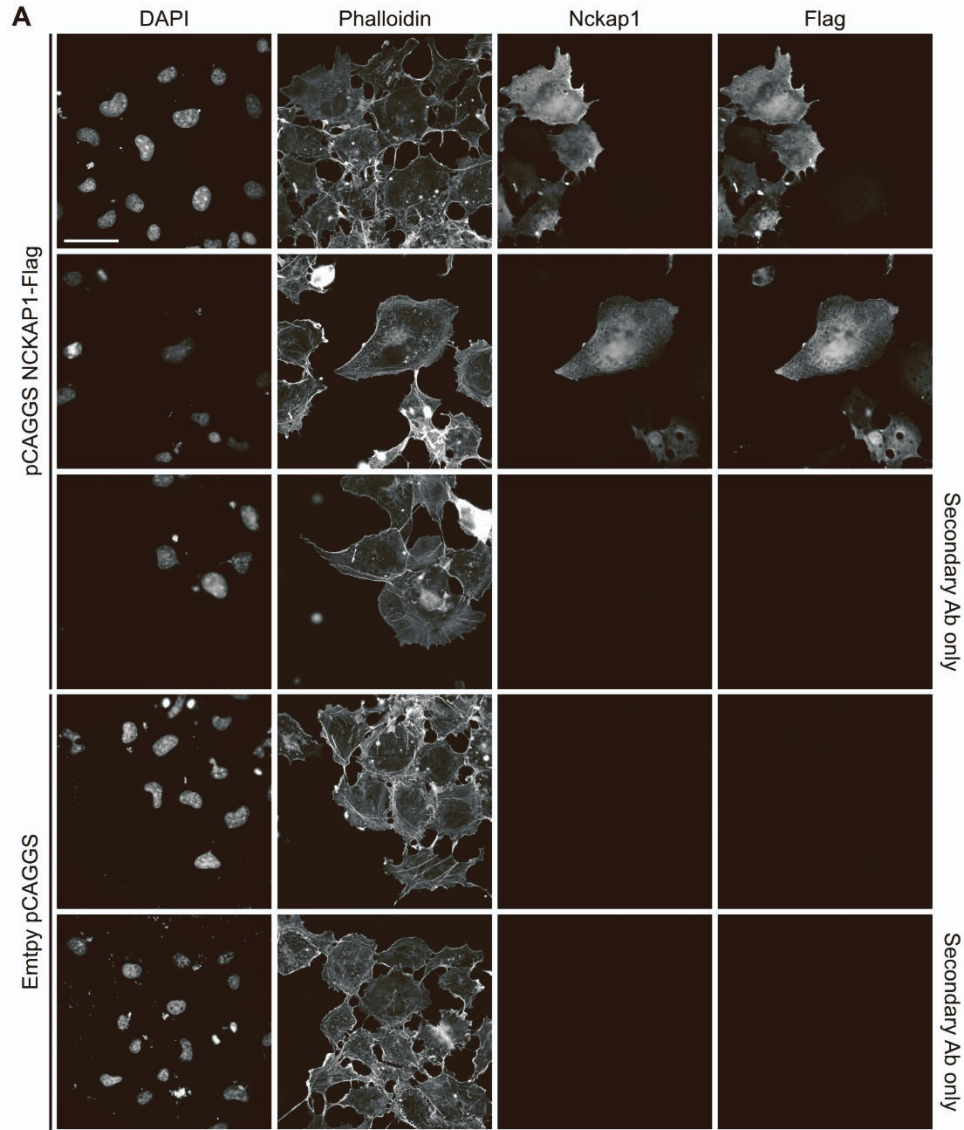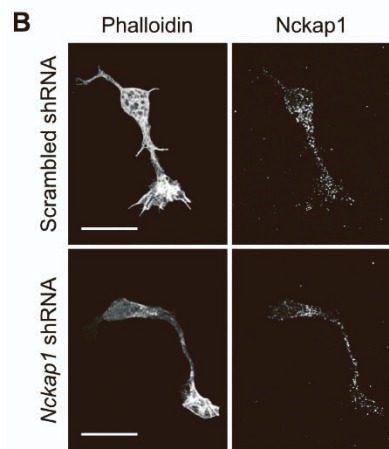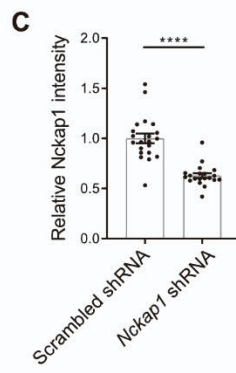

**Figure S6. Validation of the Nckap1 antibody, related to Figure 4. (A)** COS7 cells were transfected to express NCKAP1-Flag or an empty vector control (empty pCAGGS). Cells were immunostained with the anti-Nckap1 (2391-C) and anti-Flag antibody. Nuclei were labeled with DAPI and F-actin was labelled with phalloidin. The Nckap1 antibody detects overexpressed NCKAP1-Flag, giving a similar immunostaining pattern to the Flag antibody. Secondary antibody only conditions serve as additional controls. Scale bar: 50  $\mu\text{m}$ . **(B, C)** Dissociated E13.5 rat commissural neurons were electroporated with shRNA against *Nckap1* or with scrambled shRNA as a control. **(B)** Neurons were immunostained with the anti-Nckap1 (2391-C) antibody and F-actin was labelled with phalloidin. Scale bar: 20  $\mu\text{m}$ . **(C)** Mean Nckap1 fluorescence intensity ( $\pm$ SEM) of commissural neurons. Nckap1 immunostaining is significantly reduced in neurons knocked down for *Nckap1*. Unpaired t-test,  $n = 21$  and  $n = 20$  neurons for scrambled shRNA and *Nckap1* shRNA electroporated neurons, respectively. Error bars represent SEM. \*\*\*\* =  $p < 0.0001$ .

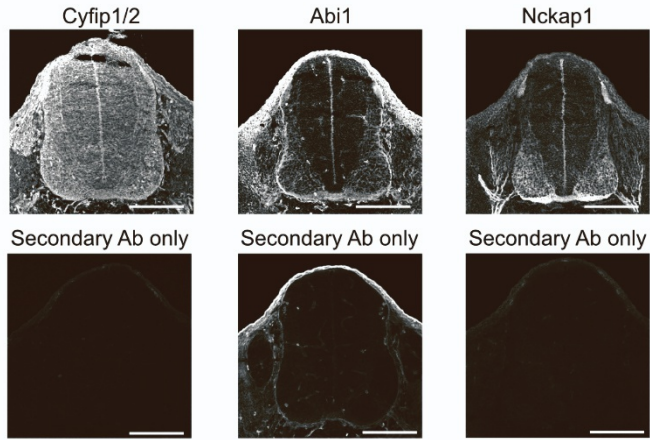

**Figure S7. Negative controls for Cyfip1/2, Abi1 and Nckap1 immunostaining in E11.5 mouse spinal cord, related to Figure 4.** E11.5 mouse spinal cord cross sections immunostained for Cyfip1/2, Abi1 or Nckap1 (top row) or with secondary antibody alone as controls (bottom row). Scale bar: 200  $\mu$ m.

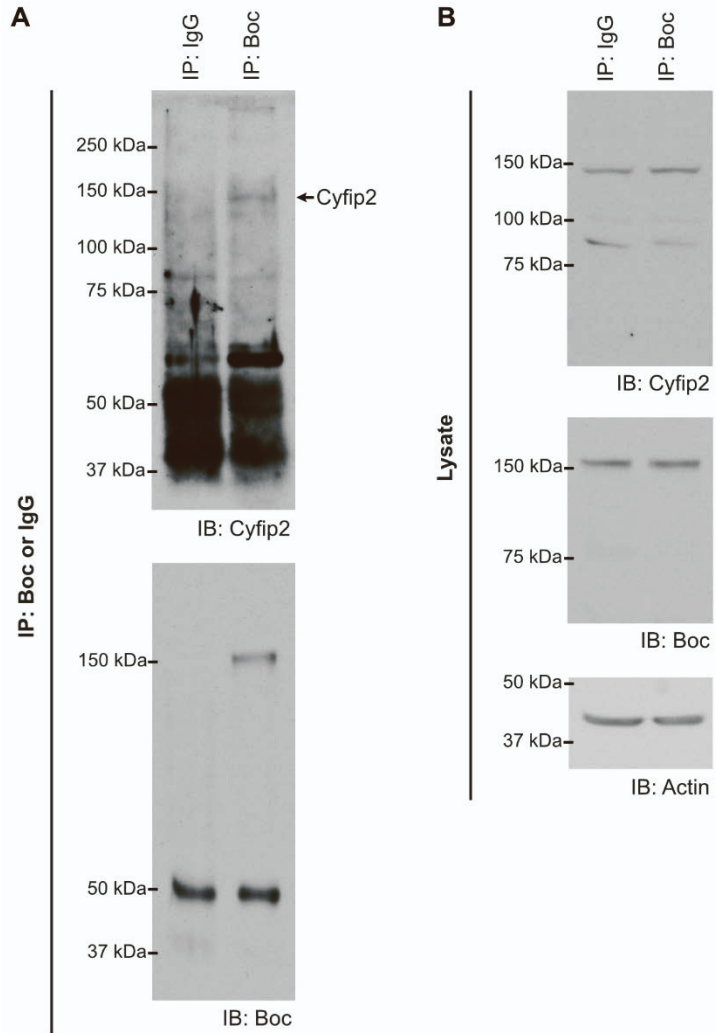

**Figure S8. Entire gels from Figure 5B, related to Figure 5.** Lysates from spinal cord commissural neurons were immunoprecipitated with an anti-Boc antibody or IgG. Coimmunoprecipitated proteins were analysed through SDS-PAGE and Western blot. **(A)** Entire uncropped gels corresponding to the Western blots of the immunoprecipitated proteins in Figure 5B. **(B)** Entire uncropped gels corresponding to the Western blots of the lysate in Figure 5B.

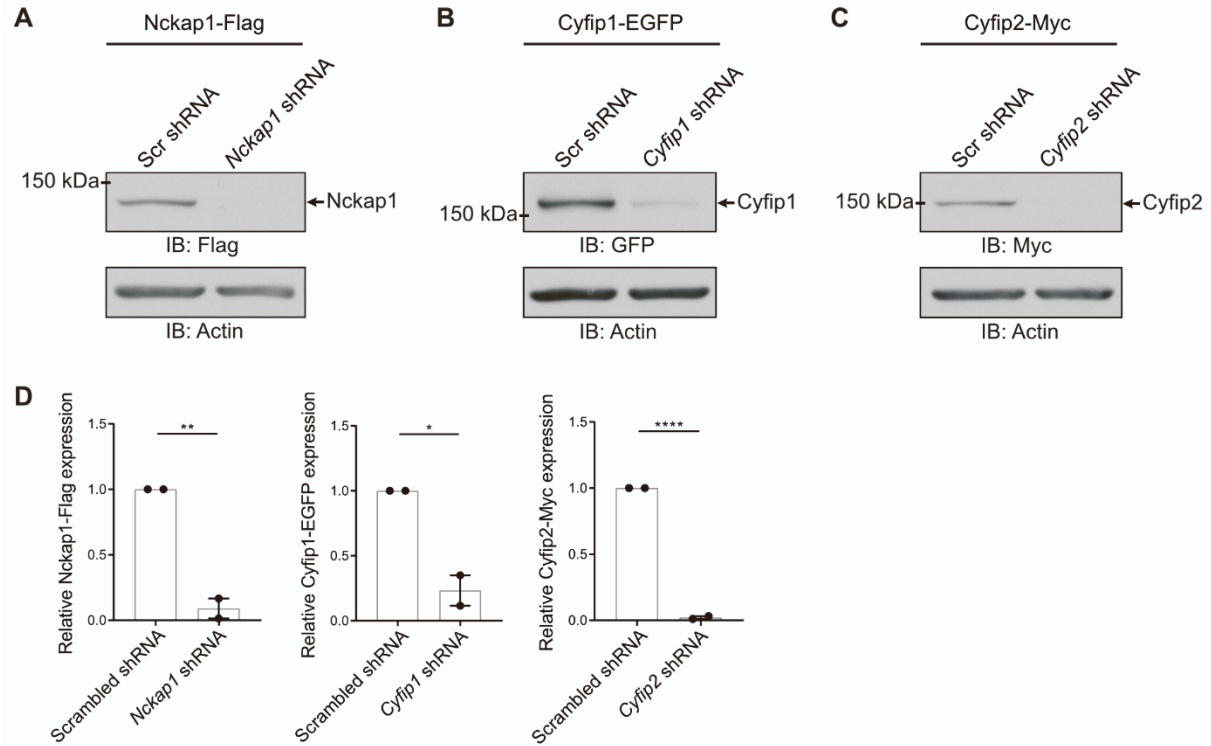

**Figure S9. Validation of *Nckap1*, *Cyfip1* and *Cyfip2* shRNAs, related to Figure 6. (A-C)** We evaluated the efficiency of each shRNAmir against its target by co-transfecting each shRNAmir or scrambled control shRNA (Scr shRNA) with its target tagged-expression plasmids (mouse) in HEK293T cells. Cell lysates were analyzed with SDS-PAGE and Western blotting. **(D)** The Western blots were quantified, and the expression level of each specified protein was normalized to actin. Graphs indicate the relative expression (mean  $\pm$  SEM) of tagged *Nckap1*, *Cyfip1* and *Cyfip2*. Unpaired t-tests, n=2 independent experiments. \* = p < 0.05, \*\* = p < 0.01, \*\*\*\* = p < 0.0001.

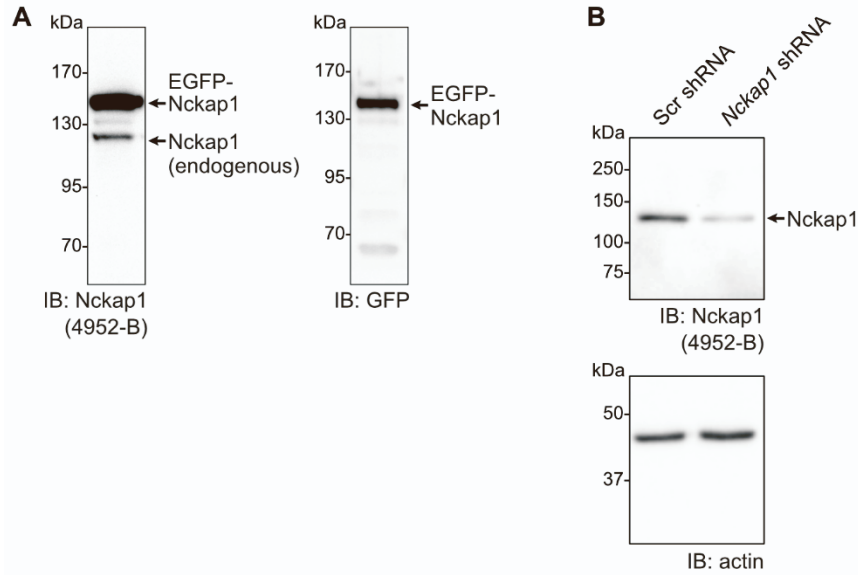

**Figure S10. Validation of Nckap1 antibody, related to Figure 6. (A)** Western blot of B16-F1 mouse melanoma cells expressing EGFP-Nckap1, immunoblotted with anti-Nckap1 (4952-B) to detect endogenous and overexpressed Nckap1 and anti-GFP to detect overexpressed EGFP-Nckap1. **(B)** Dissociated E13.5 rat commissural neurons were electroporated with shRNA against *Nckap1* or with scrambled shRNA as a control. Cell lysates were analyzed with SDS-PAGE and Western blotting with anti-Nckap1 (4952-B) and anti-actin as a loading control. Anti-Nckap1 specifically detects endogenous Nckap1 in commissural neurons, and Nckap1 expression is reduced by almost 80% in neurons knocked down for *Nckap1*.

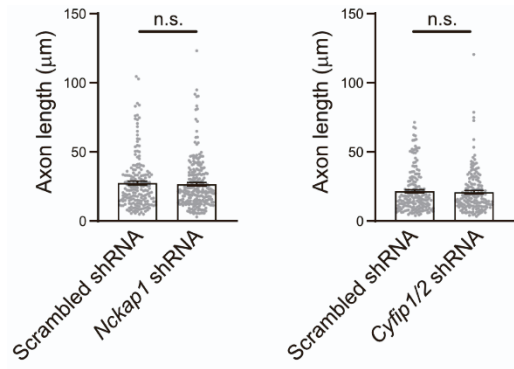

**Figure S11. *Nckap1* and *Cyfip1/2* knockdown do not affect axon length, related to Figure 6.** Commissural neurons were electroporated either with scrambled shRNA or shRNA targeting *Nckap1* or *Cyfip1/2*. Axon length of successfully electroporated neurons (which express GFP) was measured after two days of culture *in vitro*. There is no significant difference in axon length between neurons electroporated with control scrambled shRNA and shRNA targeting *Nckap1* or *Cyfip1/2*. Graphs represent the mean  $\pm$  SEM.  $n = 167$ - $236$  neurons per condition, from 3 independent experiments. Mann-Whitney test. n.s. = not significant.
